# Supplementary material
Source: MDPI journal article supplement (https://www.mdpi.com/1424-8247/15/3/380)

**Table S1: Characteristics of clinical studies exploring relationships between amlodipine and mortality in COVID-19 inpatients with hypertension**

| Study                         | Country | Number of patients | Age (mean)  | Only HTA patients                  | Only Amlodipine | Chronic prescription (9-15 days) | Mortality % Amlodipine<br>% No-Amlodipine | OR (95% CI)       | Adjusted OR (95% CI) | Adjusted covariates                                                                                                                                 |
|-------------------------------|---------|--------------------|-------------|------------------------------------|-----------------|----------------------------------|-------------------------------------------|-------------------|----------------------|-----------------------------------------------------------------------------------------------------------------------------------------------------|
| Solaimanzadeh, 2020 (15)      | USA     | 65 (32M,33F)       | 74.9 & 75.6 | -                                  | -<br>Nifedipine | ?                                | 50% (12/24)<br>85.4% (35/41)              | 0.17 (0.05-0.56)  | -                    | -                                                                                                                                                   |
| Zhang et al, 2020 (5)         | China   | 96 (51M,45F)       | 66.5        | +<br>(without other comorbidities) | +               | -                                | 0% (0/19)<br>19.5% (15/77)                | 0                 | -                    | -                                                                                                                                                   |
| Darquennes et al, 2021 (16)   | Belgium | 317 (184M, 133F)   | 62.36       | -                                  | +               | +                                | 11.7% (7/60)<br>20.6% (53/257)            | 0.51 (0.22-1.19)  | 0.24 (0.09-0.62)     | (age, HTA, chronic cardiac disease, chronic kidney disease, malignant neoplasm, chronic neurologic disorder, dementia, chronic hematologic disease) |
| Nouri-Vasken et al, 2021 (18) | Iran    | 80 (41M, 39F)      | 67.3 & 60.1 | +                                  | +               | -                                | 12.82% (5/39)<br>4.9% (2/41)              | 2.87 (0.52-15.75) | -                    | -                                                                                                                                                   |

**Table S2: Association between Amlodipine and reduced risk of death in COVID-19 patients: a retrospective cohort study**

STROBE Statement—Checklist of items that should be included in reports of *cohort studies*

|                              | Item No | Recommendation                                                                                                                                                                                                                                                                                                                                                                            |
|------------------------------|---------|-------------------------------------------------------------------------------------------------------------------------------------------------------------------------------------------------------------------------------------------------------------------------------------------------------------------------------------------------------------------------------------------|
| <b>Title and abstract</b>    | 1       | (a) Indicate the study's design with a commonly used term in the title or the abstract: yes page 1.<br>(b) Provide in the abstract an informative and balanced summary of what was done and what was found: yes page 1                                                                                                                                                                    |
| <b>Introduction</b>          |         |                                                                                                                                                                                                                                                                                                                                                                                           |
| Background/rationale         | 2       | Explain the scientific background and rationale for the investigation being reported: yes pages 2-3                                                                                                                                                                                                                                                                                       |
| Objectives                   | 3       | State specific objectives, including any prespecified hypotheses: yes page 3                                                                                                                                                                                                                                                                                                              |
| <b>Methods</b>               |         |                                                                                                                                                                                                                                                                                                                                                                                           |
| Study design                 | 4       | Present key elements of study design early in the paper: yes page 7                                                                                                                                                                                                                                                                                                                       |
| Setting                      | 5       | Describe the setting, locations, and relevant dates, including periods of recruitment, exposure, follow-up, and data collection: yes page 7-8                                                                                                                                                                                                                                             |
| Participants                 | 6       | (a) Give the eligibility criteria, and the sources and methods of selection of participants. Describe methods of follow-up: yes page 7 and see population flow chart (figure S1)<br>(b) For matched studies, give matching criteria and number of exposed and unexposed:                                                                                                                  |
| Variables                    | 7       | Clearly define all outcomes, exposures, predictors, potential confounders, and effect modifiers. Give diagnostic criteria, if applicable: yes pages 7                                                                                                                                                                                                                                     |
| Data sources/<br>measurement | 8*      | For each variable of interest, give sources of data and details of methods of assessment (measurement). Describe comparability of assessment methods if there is more than one group: yes pages 7-8                                                                                                                                                                                       |
| Bias                         | 9       | Describe any efforts to address potential sources of bias: yes 7-8                                                                                                                                                                                                                                                                                                                        |
| Study size                   | 10      | Explain how the study size was arrived at: yes pages 7-8 and see population flow chart (figure S1)                                                                                                                                                                                                                                                                                        |
| Quantitative variables       | 11      | Explain how quantitative variables were handled in the analyses. If applicable, describe which groupings were chosen and why                                                                                                                                                                                                                                                              |
| Statistical methods          | 12      | (a) Describe all statistical methods, including those used to control for confounding: yes page 8<br>(b) Describe any methods used to examine subgroups and interactions: yes page 8<br>(c) Explain how missing data were addressed<br>(d) If applicable, explain how loss to follow-up was addressed: yes see population flow chart (figure S1)<br>(e) Describe any sensitivity analyses |
| <b>Results</b>               |         |                                                                                                                                                                                                                                                                                                                                                                                           |
| Participants                 | 13*     | (a) Report numbers of individuals at each stage of study—eg numbers potentially eligible, examined for eligibility, confirmed eligible, included in the study, completing follow-up, and analysed: yes pages 7-8 and the two tables<br>(b) Give reasons for non-participation at each stage<br>(c) Consider use of a flow diagram: yes see population flow chart                          |
| Descriptive data             | 14*     | (a) Give characteristics of study participants (eg demographic, clinical, social) and information on exposures and potential confounders: yes see table 1                                                                                                                                                                                                                                 |

|                          |     |                                                                                                                                                                                                                               |
|--------------------------|-----|-------------------------------------------------------------------------------------------------------------------------------------------------------------------------------------------------------------------------------|
|                          |     | (b) Indicate number of participants with missing data for each variable of interest: yes see population flow chart (figure S1)                                                                                                |
|                          |     | (c) Summarise follow-up time (eg, average and total amount)                                                                                                                                                                   |
| Outcome data             | 15* | Report numbers of outcome events or summary measures over time                                                                                                                                                                |
| Main results             | 16  | (a) Give unadjusted estimates and, if applicable, confounder-adjusted estimates and their precision (eg, 95% confidence interval). Make clear which confounders were adjusted for and why they were included: yes see table 2 |
|                          |     | (b) Report category boundaries when continuous variables were categorized                                                                                                                                                     |
|                          |     | (c) If relevant, consider translating estimates of relative risk into absolute risk for a meaningful time period                                                                                                              |
| Other analyses           | 17  | Report other analyses done—eg analyses of subgroups and interactions, and sensitivity analyses                                                                                                                                |
| <b>Discussion</b>        |     |                                                                                                                                                                                                                               |
| Key results              | 18  | Summarise key results with reference to study objectives: yes page 4.                                                                                                                                                         |
| Limitations              | 19  | Discuss limitations of the study, taking into account sources of potential bias or imprecision. Discuss both direction and magnitude of any potential bias: yes page 7.                                                       |
| Interpretation           | 20  | Give a cautious overall interpretation of results considering objectives, limitations, multiplicity of analyses, results from similar studies, and other relevant evidence: yes pages 6-7                                     |
| Generalisability         | 21  | Discuss the generalisability (external validity) of the study results: yes page 7                                                                                                                                             |
| <b>Other information</b> |     |                                                                                                                                                                                                                               |
| Funding                  | 22  | Give the source of funding and the role of the funders for the present study and, if applicable, for the original study on which the present article is based: yes page 9                                                     |

\*Give information separately for exposed and unexposed groups.

**Note:** An Explanation and Elaboration article discusses each checklist item and gives methodological background and published examples of transparent reporting. The STROBE checklist is best used in conjunction with this article (freely available on the Web sites of PLoS Medicine at <http://www.plosmedicine.org/>, Annals of Internal Medicine at <http://www.annals.org/>, and Epidemiology at <http://www.epidem.com/>). Information on the STROBE Initiative is available at <http://www.strobe-statement.org>.

**Figure S1: Population flow chart**

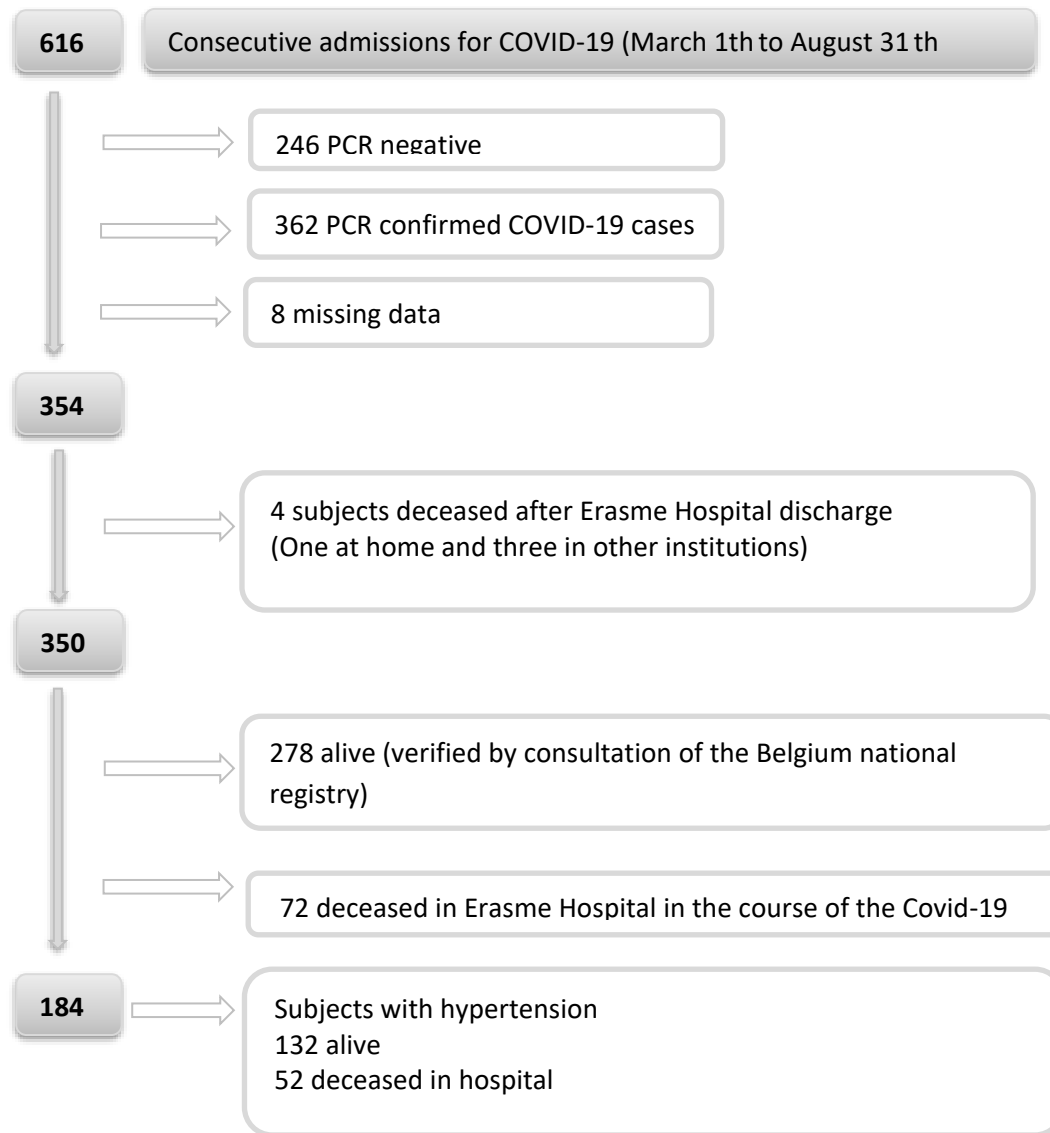

Supplement: s1 [file s1]
